# Supplementary material for: Template-directed self-assembly by way of molecular recognition at the micellar–solvent interface: modulation of the critical micelle concentration
Source: Royal Society of Chemistry journal article supplement (doi:10.1039/c3ob41467a), 2013-01-01
Supplement: c3ob41467a.pdf [file c3ob41467a.pdf]

# Organic & Biomolecular Chemistry

---

## Template-Directed Self-Assembly by way of Molecular Recognition at the Micellar-Solvent Interface: Modulation of the Critical Micelle Concentration

Mark A. Olson, \* Jonathan R. Thompson, Trenton J. Dawson, Chris M. Hernandez, Marco S. Messina, and Travis O'Neal

*Department of Physical and Environmental Sciences, Texas A&M University Corpus Christi, 6300 Ocean Dr, Corpus Christi, TX 78412-5774, United States*

## Electronic Supporting Information

|                                                                                                                                                                                                                                                                         |
|-------------------------------------------------------------------------------------------------------------------------------------------------------------------------------------------------------------------------------------------------------------------------|
| <b>* Correspondence Address</b>                                                                                                                                                                                                                                         |
| Professor Mark A. Olson<br>Department of Physical and Environmental Sciences<br>Texas A&M University Corpus Christi<br>6300 Ocean Drive<br>Corpus Christi, Texas 78412-5774<br>Tel: (+1)-361-825-3293<br>Fax: (+1)-361-825-3719<br><i>E-Mail: mark.olson@tamucc.edu</i> |

## Additional Spectroscopic Characterisation

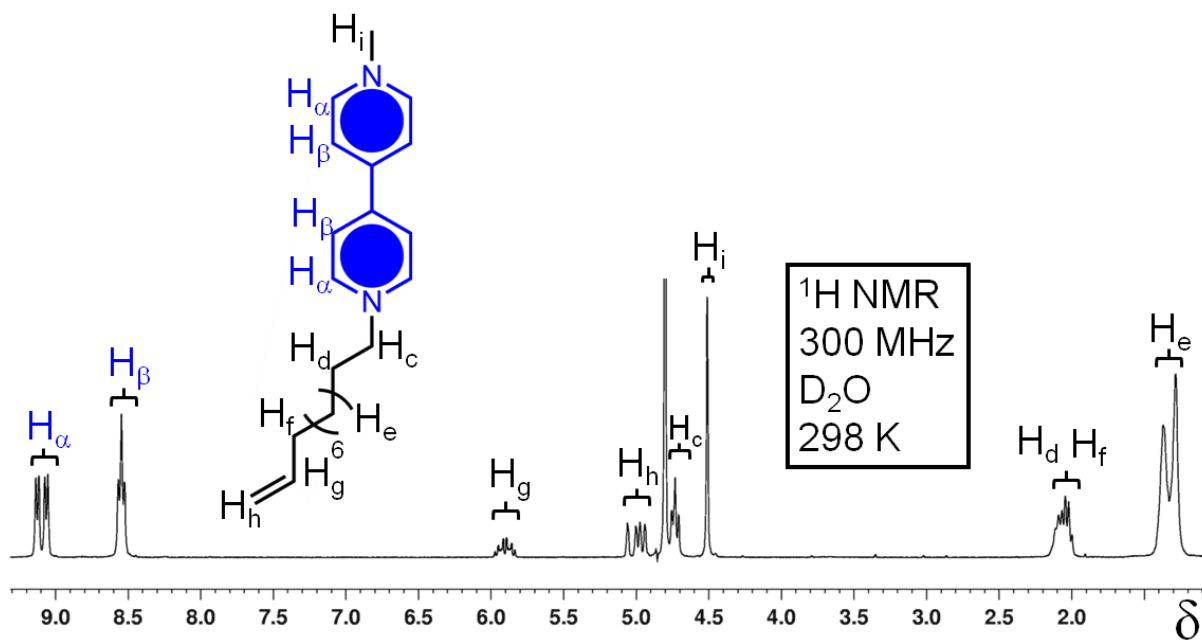

Figure S1: <sup>1</sup>H NMR spectrum of **1**<sup>2+</sup> in D<sub>2</sub>O at 298 K

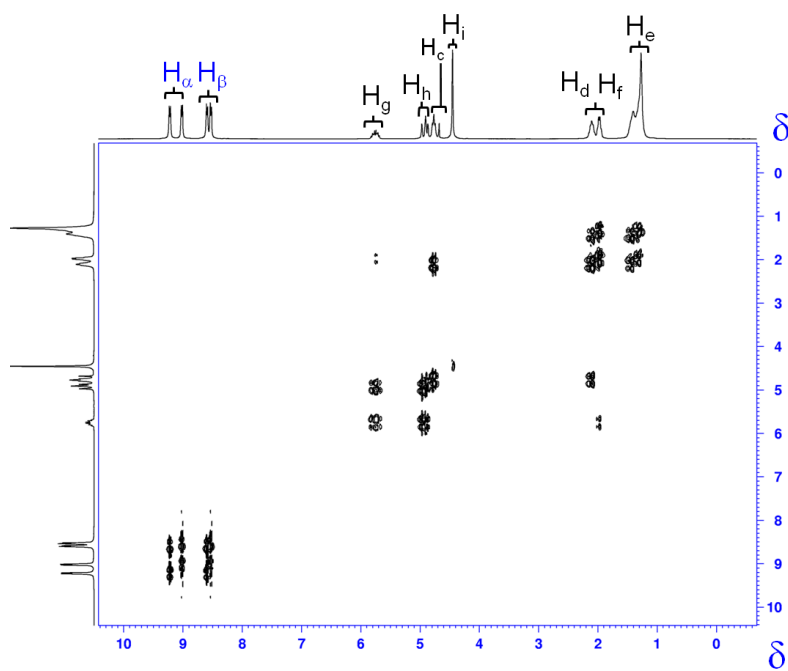

Figure S2: The <sup>1</sup>H-<sup>1</sup>H g-DQF-COSY spectrum (300 MHz) of **1**<sup>2+</sup> in D<sub>2</sub>O at 298 K

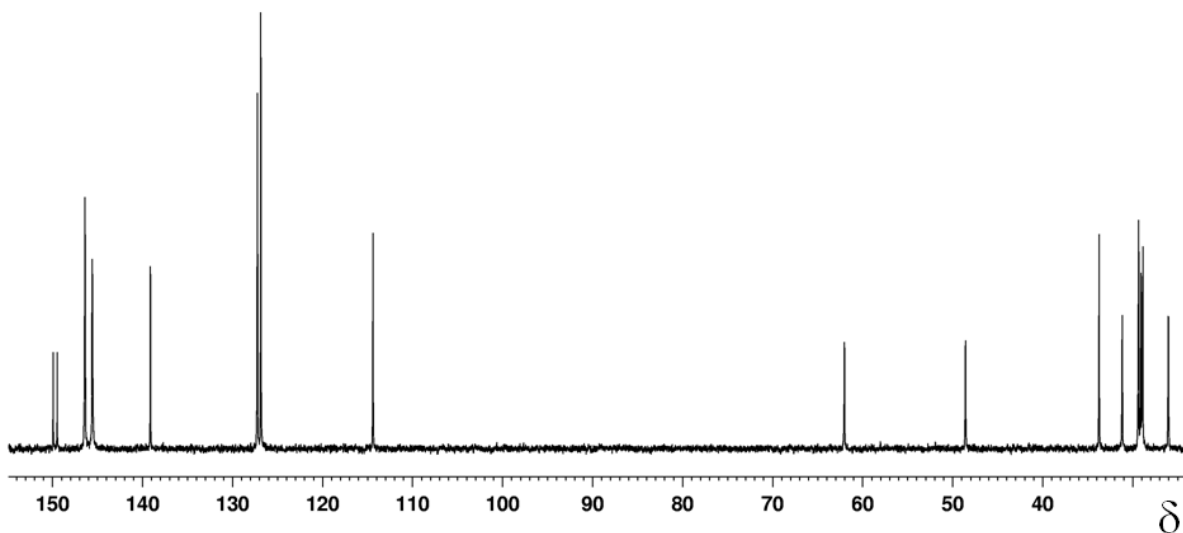

**Figure S3:**  $^{13}\text{C}$  NMR spectrum (300 MHz) of  $1^{2+}$  in  $\text{D}_2\text{O}$  at 298 K

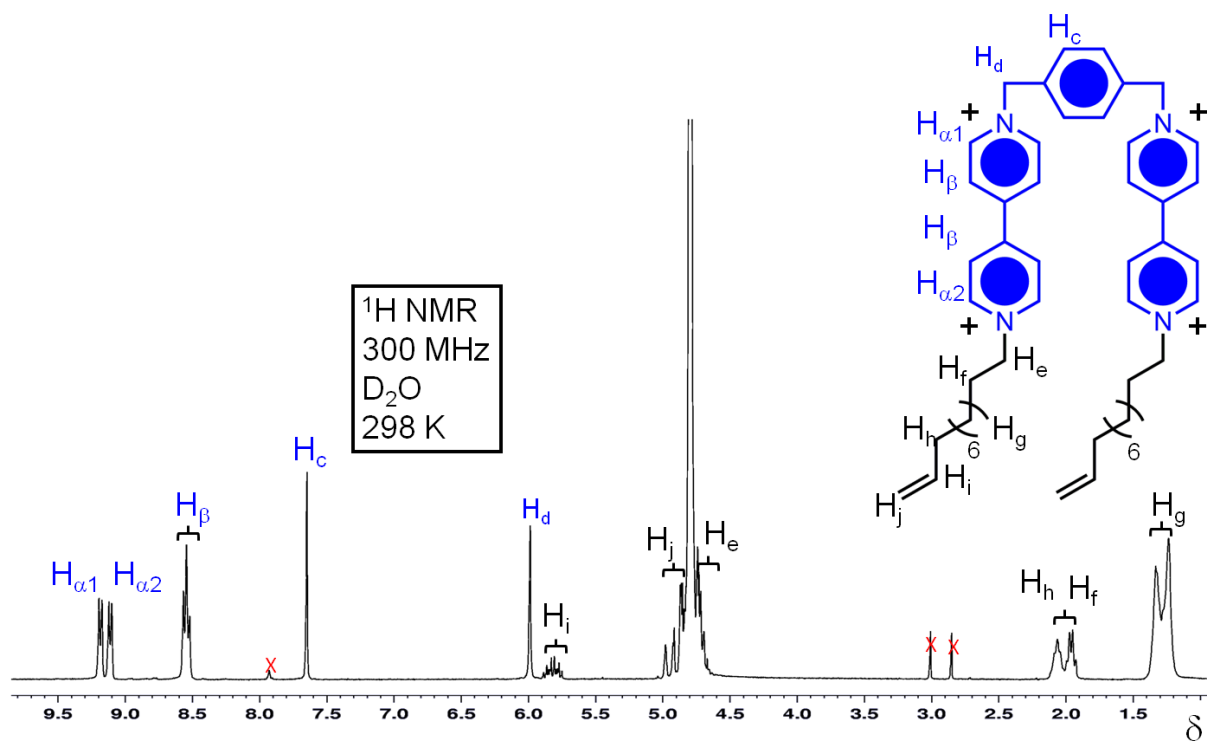

**Figure S4:**  $^1\text{H}$  NMR spectrum of  $2^{4+}$  in  $\text{D}_2\text{O}$  at 298 K

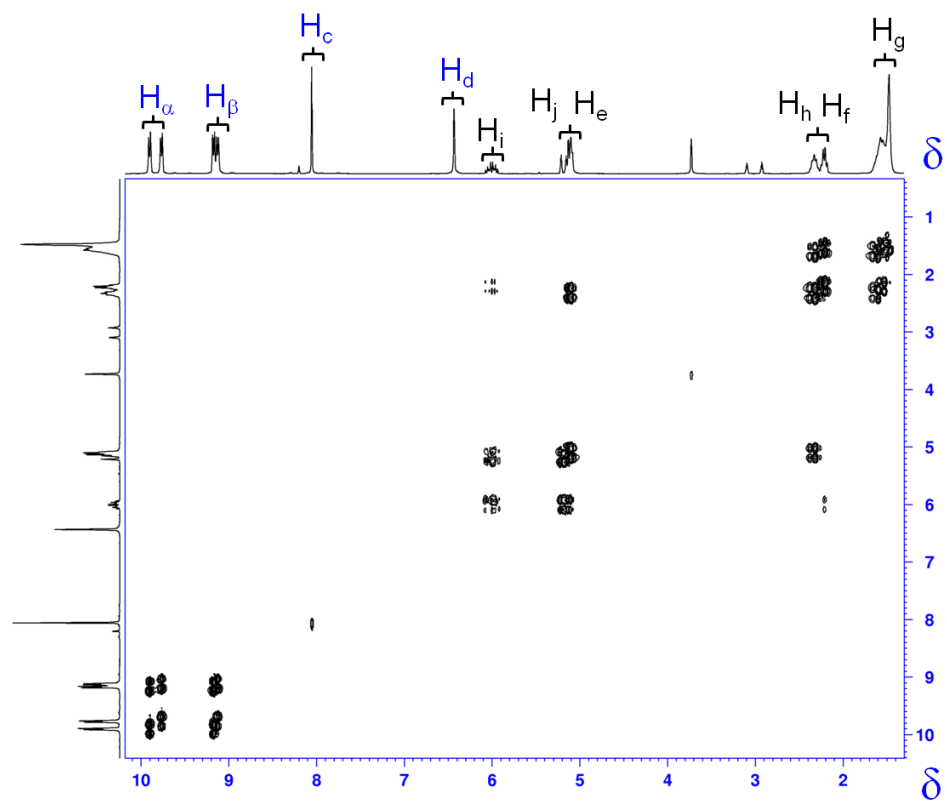

**Figure S5:** The  $^1\text{H}$ - $^1\text{H}$  g-DQF-COSY spectrum (300 MHz) of  $2^{4+}$  in  $\text{DMF-d}_7$  as the  $4\text{PF}_6^-$  salt at 298 K

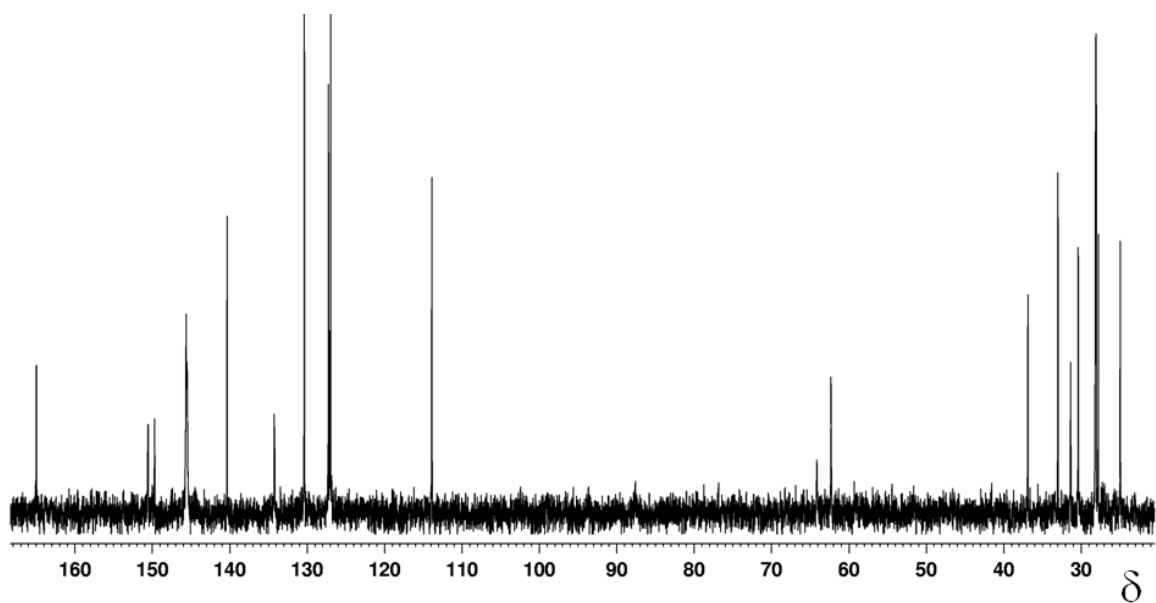

**Figure S6:**  $^{13}\text{C}$  NMR spectrum (300 MHz) of  $2^{4+}$  in  $\text{DMF-d}_7$  as the  $4\text{PF}_6^-$  salt at 298 K
